# Supplementary material for: The C9orf72 protein interacts with Rab1a and the ULK1 complex to regulate initiation of autophagy
Source: PubMed Central journal article supplement (PMC4969571; doi:10.15252/embj.201694401), 2016-06-22
Supplement: EMBJ-35-1656-s001.pdf [file EMBJ-35-1656-s001.pdf]

## **The C9orf72 protein interacts with Rab1a and the ULK1 complex to regulate initiation of autophagy**

**Authors:** Christopher P. Webster<sup>1,4</sup>, Emma F. Smith<sup>1,4</sup>, Claudia S. Bauer<sup>1</sup>, Annekathrin Moller<sup>1</sup>, Guillaume M. Hautbergue<sup>1</sup>, Laura Ferraiuolo<sup>1</sup>, Monika Myszczyńska<sup>1</sup>, Adrian Higginbottom<sup>1</sup>, Matthew J. Walsh<sup>1</sup>, Alexander J. Whitworth<sup>2,5</sup>, Brian K. Kaspar<sup>3</sup>, Kathrin Meyer<sup>3</sup>, Pamela J. Shaw<sup>1</sup>, Andrew J. Grierson<sup>1,6</sup>, and Kurt J. De Vos<sup>1,6,7</sup>

### **Appendix Supplementary information:**

Appendix Figure S1: Single C9orf72 siRNAs impair initiation of autophagy

Appendix Figure S2: Quantification of siRNA knock down.

Appendix Figure S3: Identification of input in GST pull down experiments by mass spectrometry.

Appendix Figure S4: C9orf72 mRNA levels in iNeurons.

Appendix Table S1. Patient information.

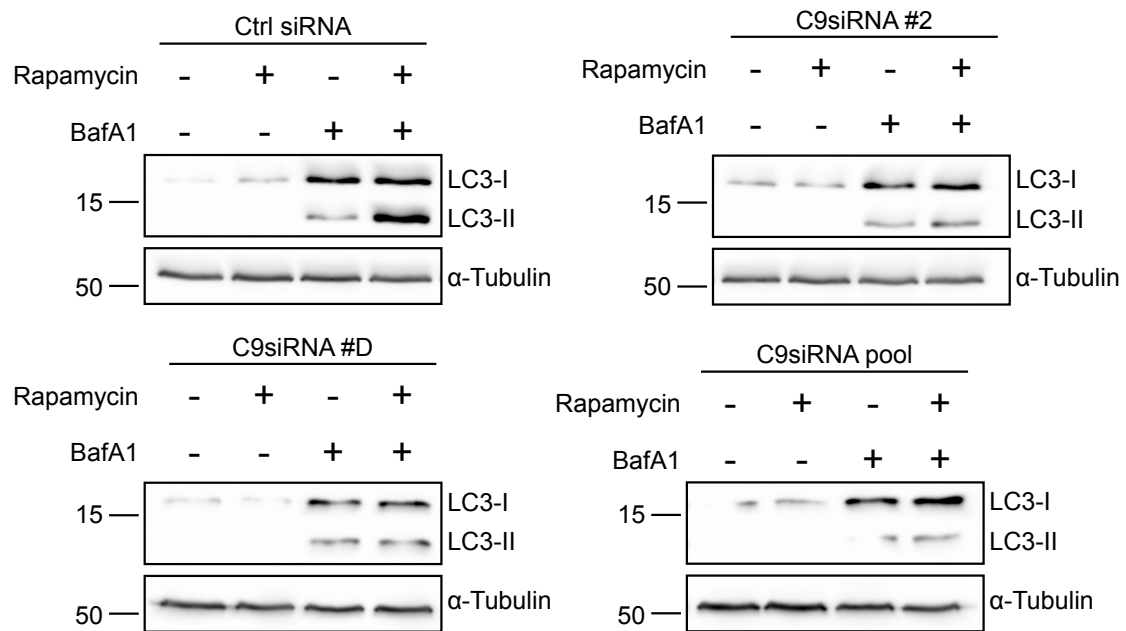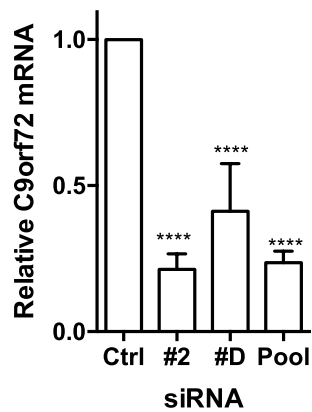

**Appendix Figure S1: Single C9orf72 siRNAs impair initiation of autophagy.**

HEK293 cells treated with non-targeting (Ctrl), C9orf72 siRNA #2, C9orf72 siRNA #D, or a pool of C9orf72 siRNA #2 and #D were incubated with vehicle, rapamycin, BafA1, or BafA1+Rapamycin and levels of LC3-I and II were determined on immunoblots. Both single C9orf72 siRNAs #2 and #D knocked down C9orf72 expression and inhibited initiation of autophagy similar to the pool of siRNAs. Knock down efficiency was tested by RT-QPCR from 3 independent experiments (including the experiment shown here). Statistical significance was determined by one-way ANOVA with Fisher's LSD test. \*\*\*  $p \leq 0.001$ , \*\*\*\*  $p \leq 0.0001$

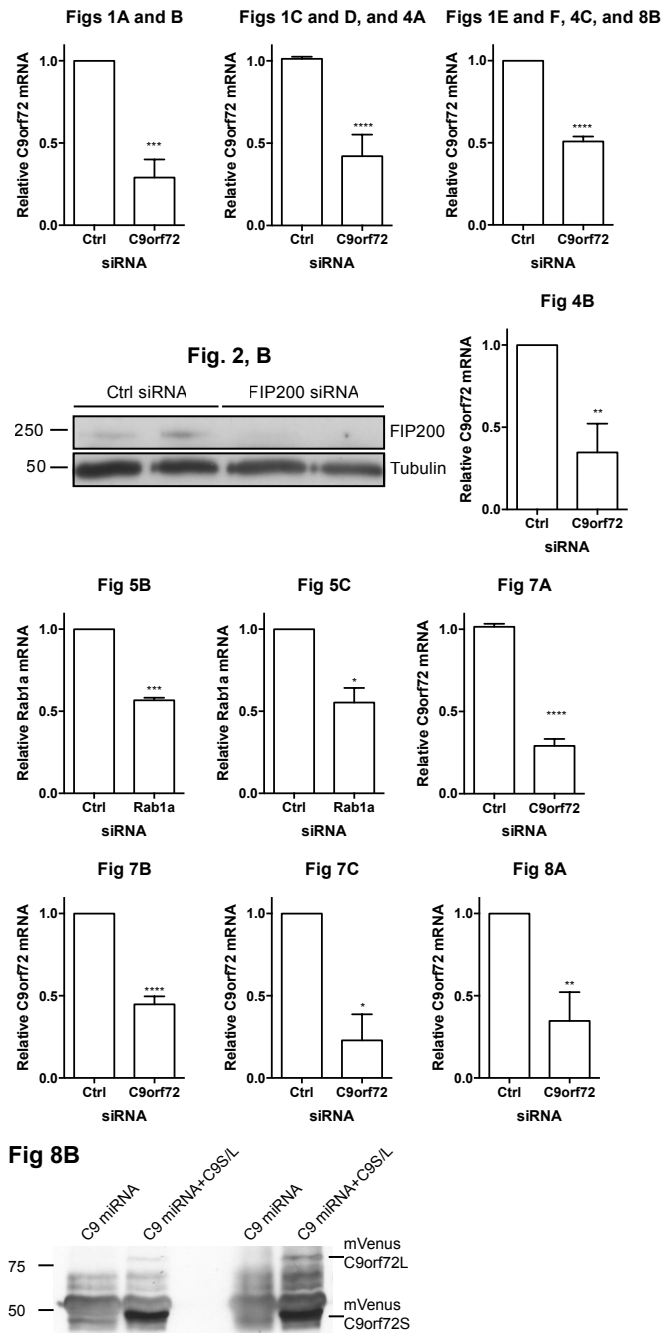

**Appendix Figure S2: Q** quantification of siRNA knock down. Knockdown of C9orf72 and Rab1a was quantified by RT-qPCR. FIP200 knock down and re-expression of human C9orf72 in neurons was determined by immunoblot. Matching figures are indicated in the title of each panel. Statistical significance was determined by unpaired t-test. \*  $p \leq 0.05$ , \*\*  $p \leq 0.01$ , \*\*\*  $p \leq 0.001$ , \*\*\*\*  $p \leq 0.0001$ .

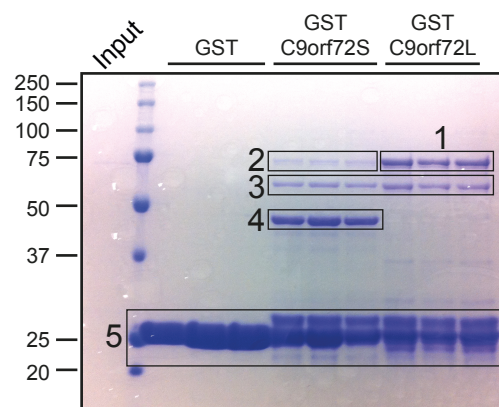

| Band | Identity                        |
|------|---------------------------------|
| 1    | GST-C9orf72L                    |
| 2    | DnaK Chaperonin E.coli          |
| 3    | CH60 E.coli - 60 kDa Chaperonin |
| 4    | GST-C9orf72S                    |
| 5    | GST/30S ribosome Ecoli          |

**Appendix Figure S3: Identification of input in GST pull down experiments by mass spectrometry.** Indicated bands were excised from a Coomassie stained gel and proteins identified by LC-MS/MS.

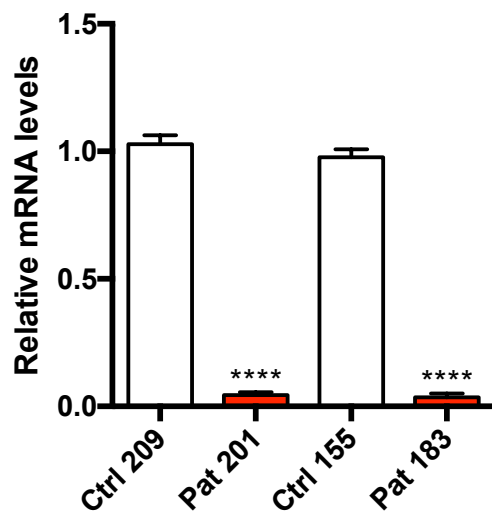

**Appendix Figure S4: C9orf72 mRNA levels in iNeurons.** The levels of C9orf72 mRNA were determined by RT-qPCR (Statistical significance was determined by one-way ANOVA with Fisher's LSD test. (\*\*\*\*  $p \leq 0.0001$ ;  $n = 4$ ))

**Appendix Table S1. Patient information**

| <b>Sample ID</b> | <b>Ethnicity</b> | <b>Gender</b> | <b>Mutation</b> | <b>Age at diagnosis and biopsy collection (y)</b> |
|------------------|------------------|---------------|-----------------|---------------------------------------------------|
| <b>155</b>       | Caucasian        | Male          | Non-ALS         | 40                                                |
| <b>183</b>       | Caucasian        | Male          | C9orf72         | 49                                                |
| <b>209</b>       | Caucasian        | Female        | Non-ALS         | 69                                                |
| <b>201</b>       | Caucasian        | Female        | C9orf72         | 66                                                |
