# Supplementary material for: The C9orf72 protein interacts with Rab1a and the ULK1 complex to regulate initiation of autophagy
Source: PubMed Central journal article supplement (PMC4969571; doi:10.15252/embj.201694401), 2016-06-22
Supplement: EMBJ-35-1656-s002.pdf [file EMBJ-35-1656-s002.pdf]

## Expanded View Figures

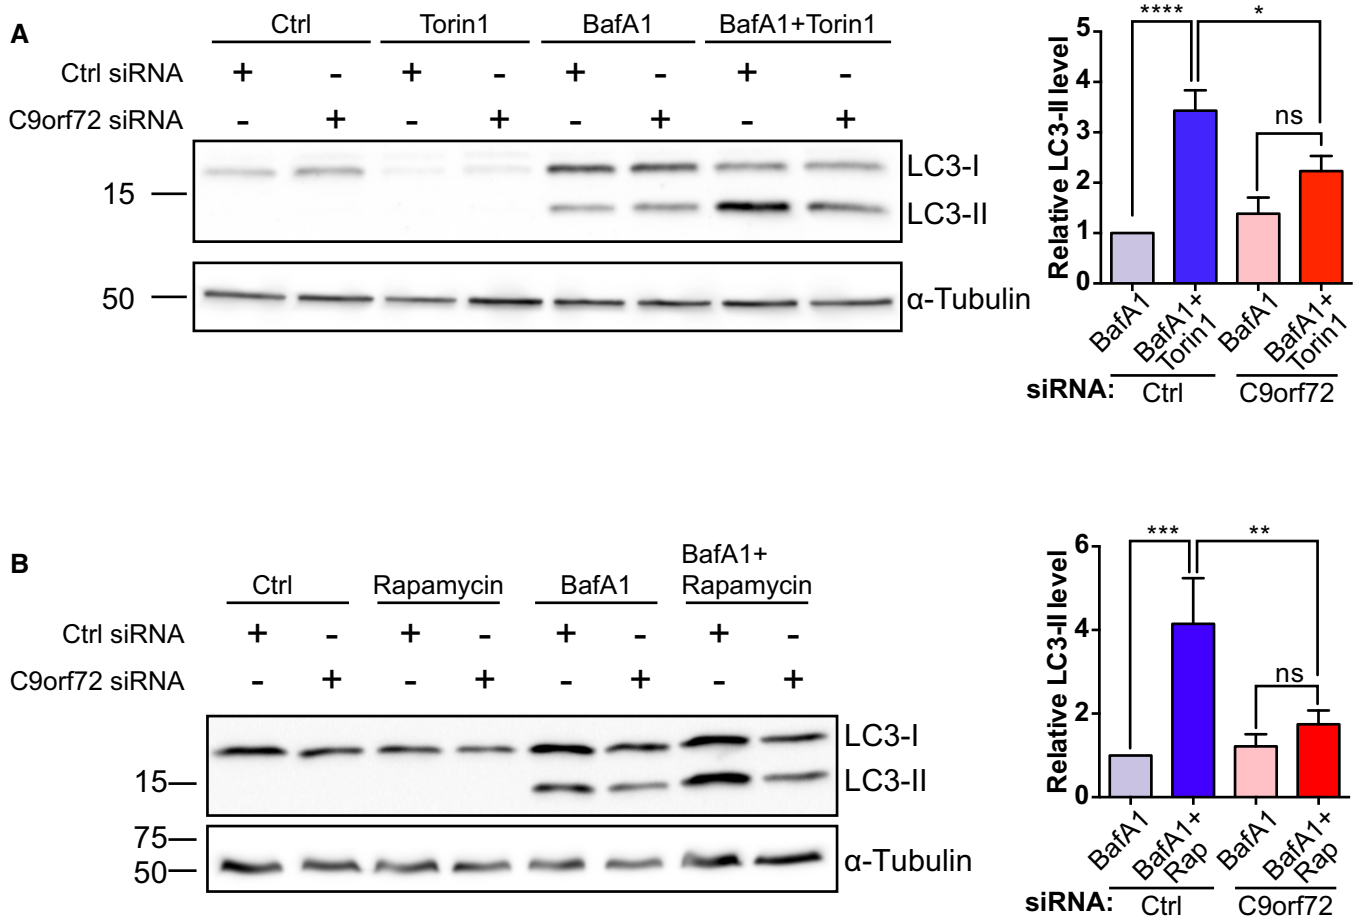**Figure EV2. C9orf72 interacts with the ULK1 initiation complex.**

- A** HeLa cells were transfected with FLAG-FIP200, Myc-C9orf72S and Myc-C9orf72L or co-transfected with FLAG-FIP200 and either Myc-C9orf72S or Myc-C9orf72L as indicated. Transfections were laced with mVenus to enable identification of transfected cells for analysis (green). Transfected cells were probed with both anti-FLAG and anti-Myc antibodies and processed for PLA. PLA proximity signals per cell (red) were determined (mean  $\pm$  SEM; one-way ANOVA with Fisher's LSD test: \*\*\*\* $P \leq 0.0001$ ;  $N$  (cells) = FLAG-FIP200: 18, Myc-C9orf72S: 22, Myc-C9orf72L: 18, FLAG-FIP200 + Myc-C9orf72S: 18, FLAG-FIP200 + Myc-C9orf72L: 17). Scale bar = 20  $\mu$ m.
- B** HeLa cells were transfected with HA-ULK1, Myc-C9orf72S and Myc-C9orf72L or co-transfected with HA-ULK1 and either Myc-C9orf72S or Myc-C9orf72L as indicated. Transfections were laced with mVenus to enable identification of transfected cells for analysis (green). Transfected cells were probed with both anti-HA and anti-myc antibodies and processed for PLA. PLA proximity signals per cell (red) were determined (mean  $\pm$  SEM; one-way ANOVA with Fisher's LSD test: \*\*\*\* $P \leq 0.0001$ ;  $N$  (cells) = HA-ULK1: 20, Myc-C9orf72S: 21, Myc-C9orf72L: 20, HA-ULK1 + Myc-C9orf72S: 22, HA-ULK1 + Myc-C9orf72L: 20). Scale bar = 20  $\mu$ m.
- C** HeLa cells were transfected with Myc-ATG13, EGFP-C9orf72S and EGFP-C9orf72L or co-transfected with Myc-ATG13 and either EGFP-C9orf72S or EGFP-C9orf72L. The ATG13 transfection was laced with mVenus to enable detection of transfected cells for analysis (green). Transfected cells were probed with both anti-EGFP and anti-myc antibodies and processed for PLA. PLA proximity signals per cell (red) were determined (mean  $\pm$  SEM; one-way ANOVA with Fisher's LSD test: \*\*\*\* $P \leq 0.0001$ ;  $N$  (cells) = ATG13: 11, EGFPc2-C9orf72S: 11, EGFPc2-C9orf72L: 10, Myc-ATG13 + EGFPc2-C9orf72S: 11, Myc-ATG13 + EGFPc2-C9orf72L: 11). Scale bar = 20  $\mu$ m.

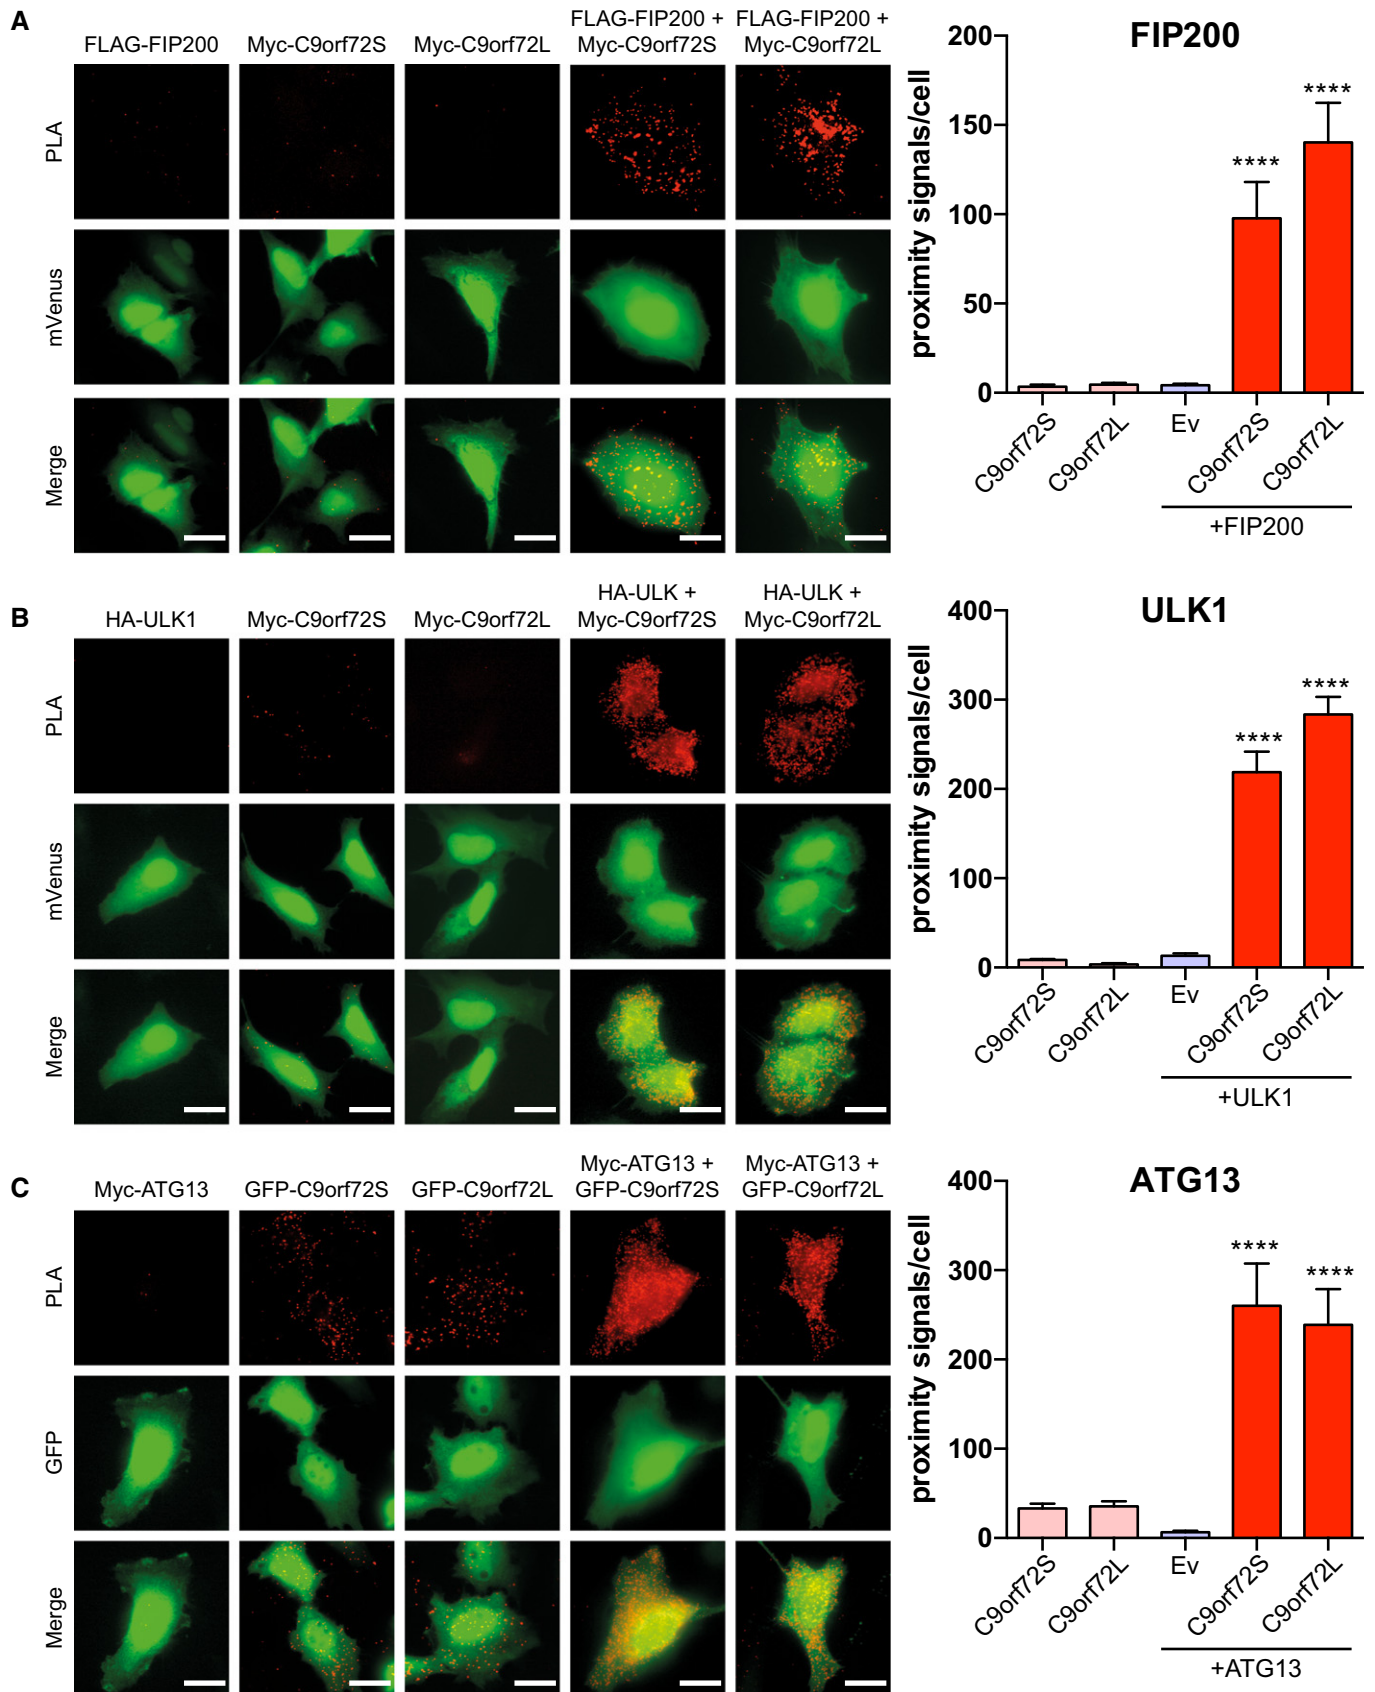

Figure EV2.

**Figure EV3. C9orf72 regulates translocation of the ULK1 complex to the phagophore via Rab1a.**

- A HeLa cells were co-transfected with empty vector (EV), FLAG-C9orf72S or FLAG-C9orf72S (green), Myc-Rab1aWT or dominant negative Myc-Rab1aS25N (DN), and mCherry-FIP200 (red). 24 h post-transfection, cells were treated with Torin1 (250 nM; 3 h). Translocation of the ULK1 complex was quantified as the number of mCherry-FIP200-positive puncta per cell from 7 independent experiments (mean  $\pm$  SEM; one-way ANOVA with Fisher's LSD test: ns, not significant,  $**P \leq 0.01$ ,  $****P \leq 0.0001$ ; N (cells) = WT/EV: 142; WT/EV/Torin1: 73; WT/C9orf72L: 108; WT/C9orf72S: 123; DN/EV: 159; DN/EV/Torin1: 150; DN/C9orf72L: 159; DN/C9orf72S: 123). Scale bar = 10  $\mu$ m.
- B HeLa cells were co-transfected with empty vector (EV), FLAG-C9orf72S or FLAG-C9orf72S (red), Myc-Rab1aWT or dominant negative Myc-Rab1aS25N (DN), and EGFP-LC3 (green). 24 h post-transfection, cells were treated with Torin1 (250 nM; 3 h). Autophagosomes were quantified as the number of EGFP-LC3-positive puncta per cell from 2 independent experiments (mean  $\pm$  SEM; one-way ANOVA with Fisher's LSD test: ns, not significant,  $**P \leq 0.01$ ,  $****P \leq 0.0001$ ; N (cells) = WT/EV: 51; WT/EV/Torin1: 53; WT/C9orf72L: 56; WT/C9orf72S: 41; DN/EV: 53; DN/EV/Torin1: 53; DN/C9orf72L: 55; DN/C9orf72S: 42). Scale bar = 10  $\mu$ m.

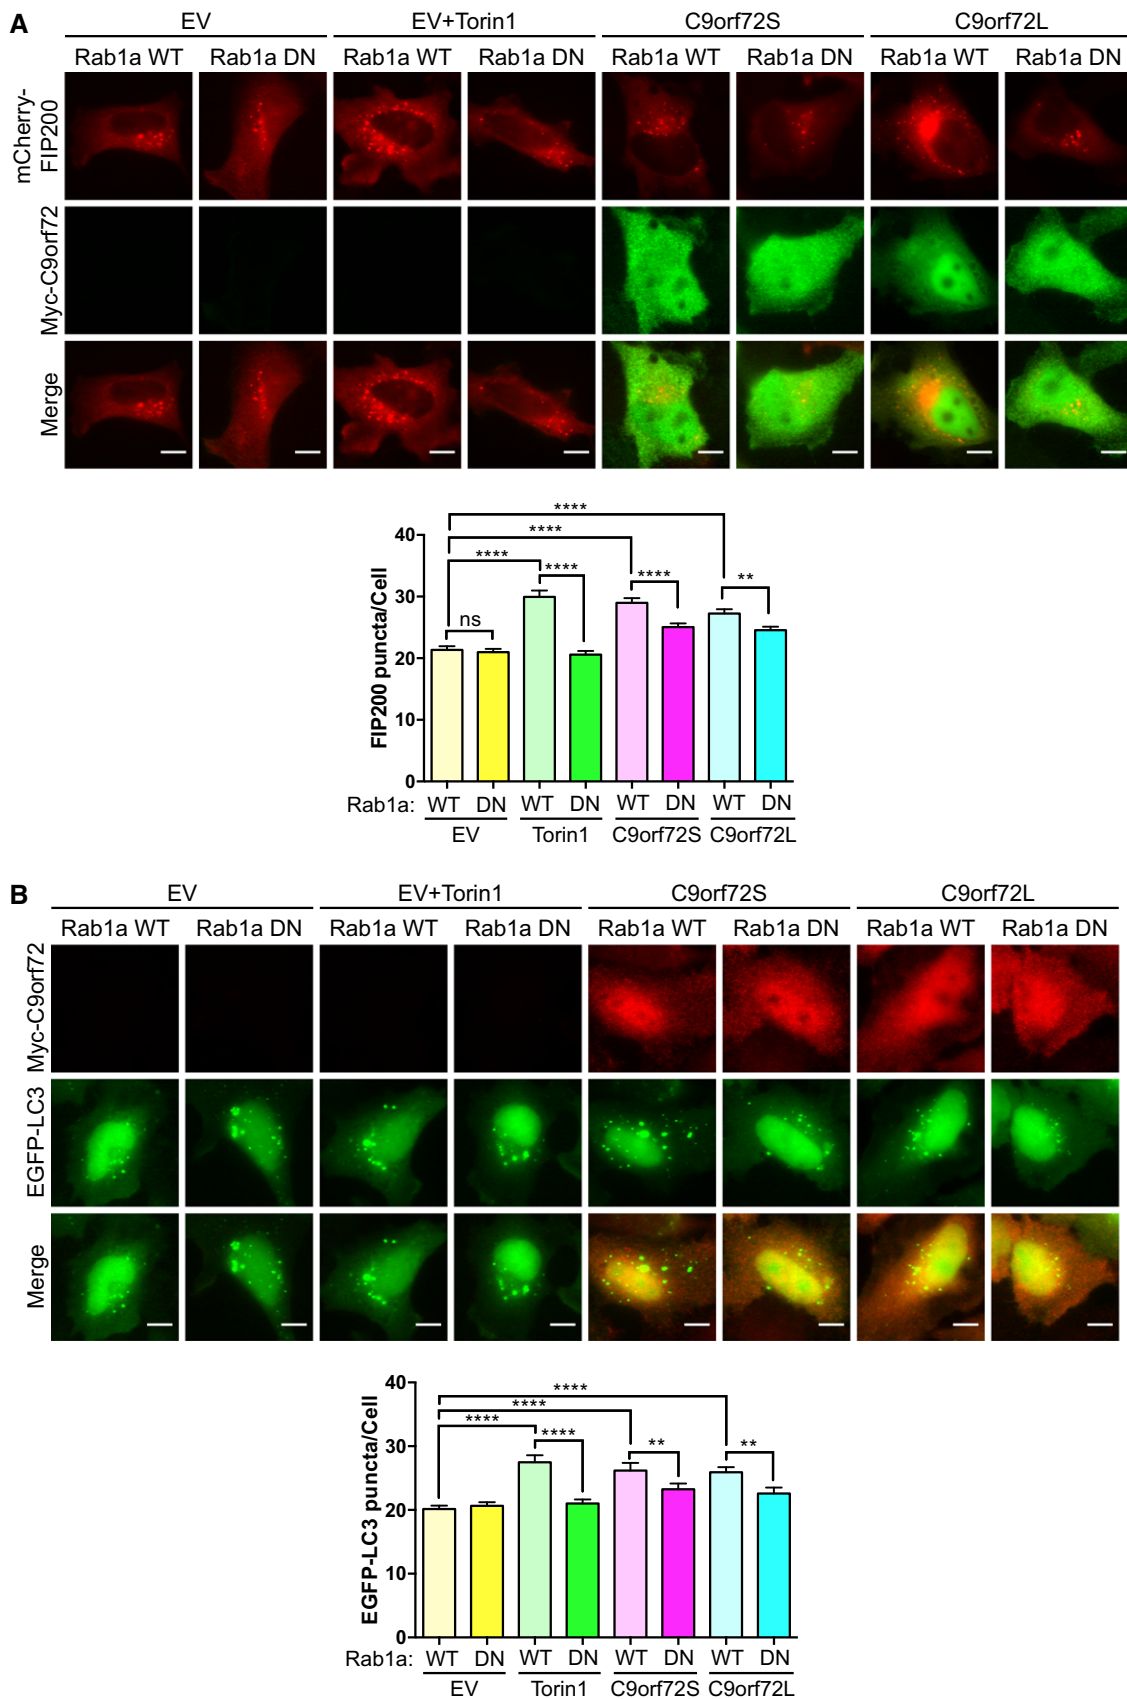

Figure EV3.
