# Supplementary material for: The C9orf72 protein interacts with Rab1a and the ULK1 complex to regulate initiation of autophagy
Source: PubMed Central journal article supplement (PMC4969571; doi:10.15252/embj.201694401), 2016-06-22

Figure 3A

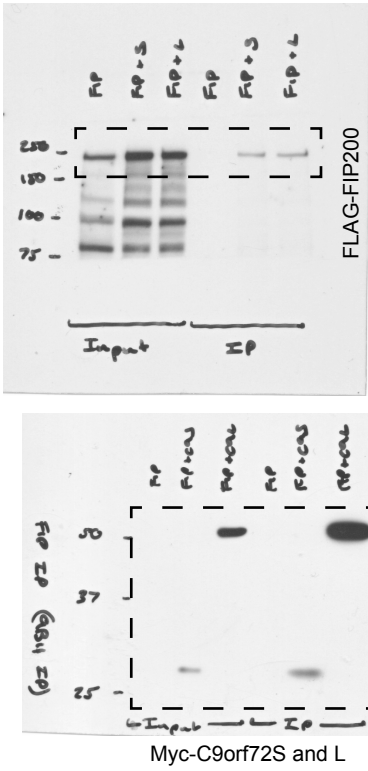

Figure 3B

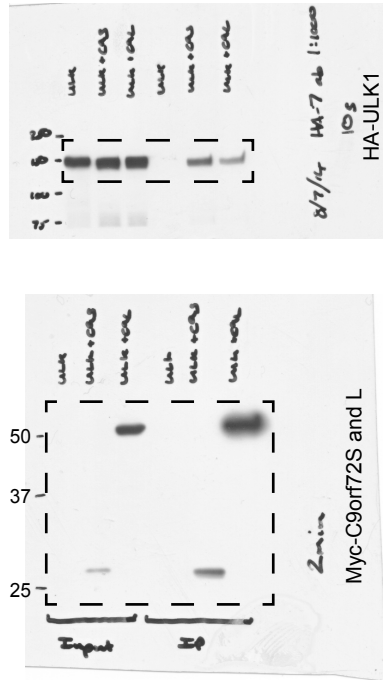

Figure 3C

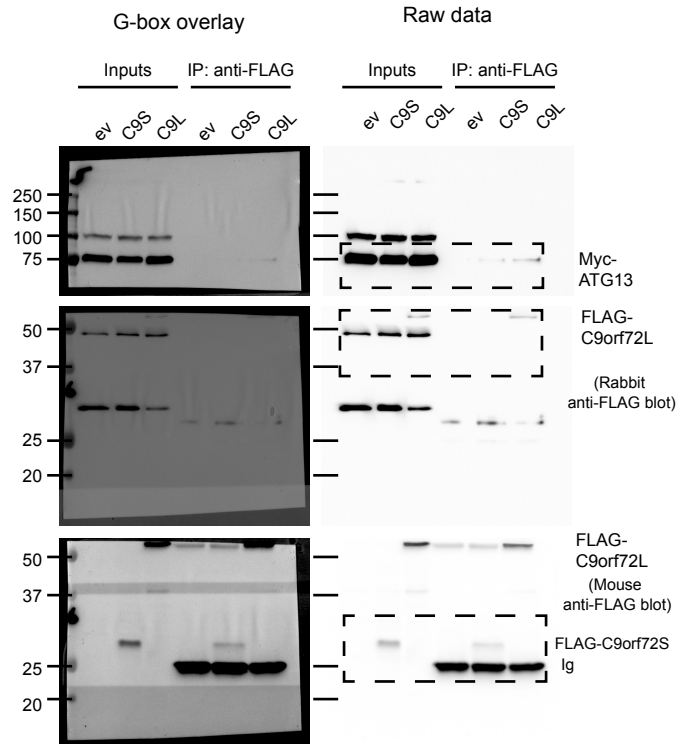

Figure 3D

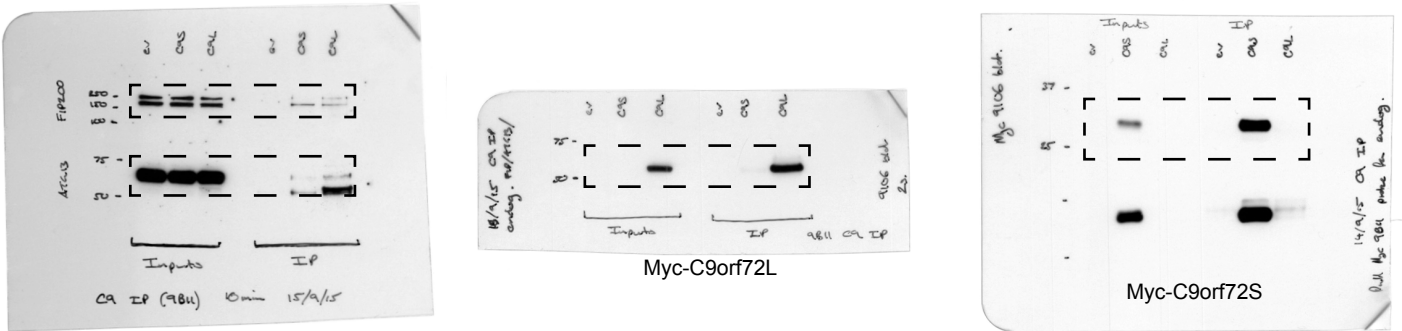

Figure 3E

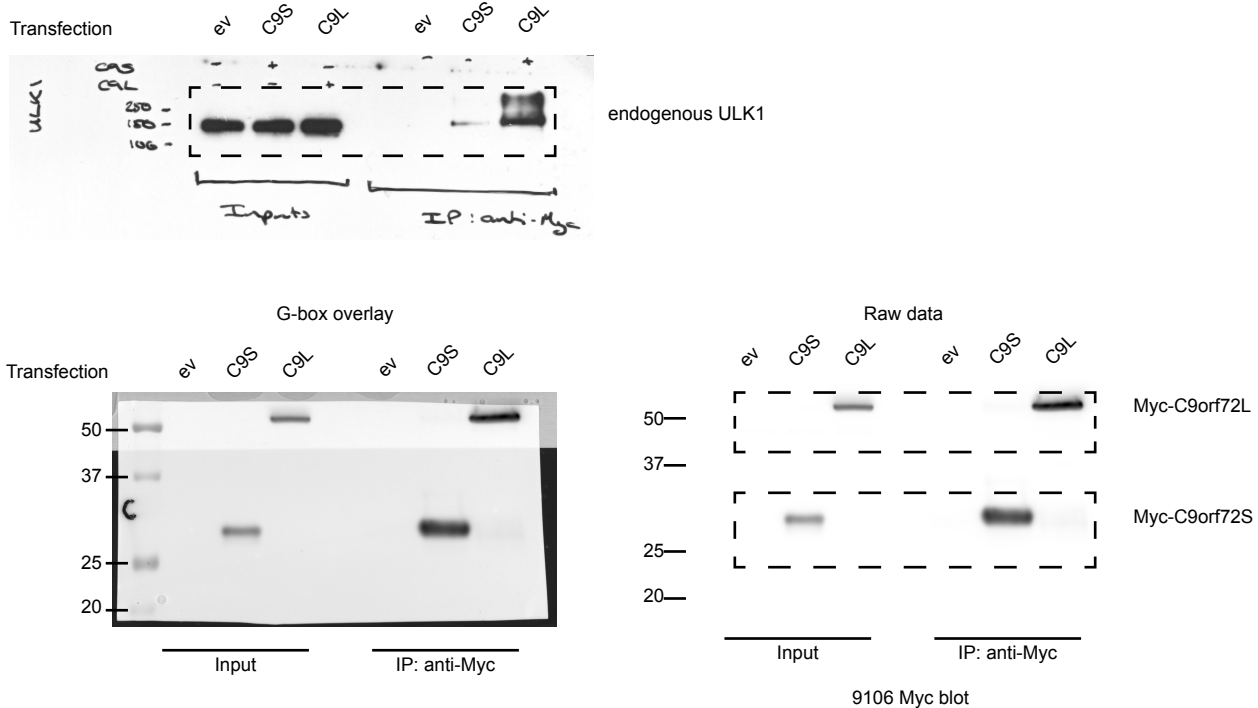

Supplement: EMBJ-35-1656-s005.pdf [file EMBJ-35-1656-s005.pdf]
