# Supplementary material for: The C9orf72 protein interacts with Rab1a and the ULK1 complex to regulate initiation of autophagy
Source: PubMed Central journal article supplement (PMC4969571; doi:10.15252/embj.201694401), 2016-06-22

Figure 6B

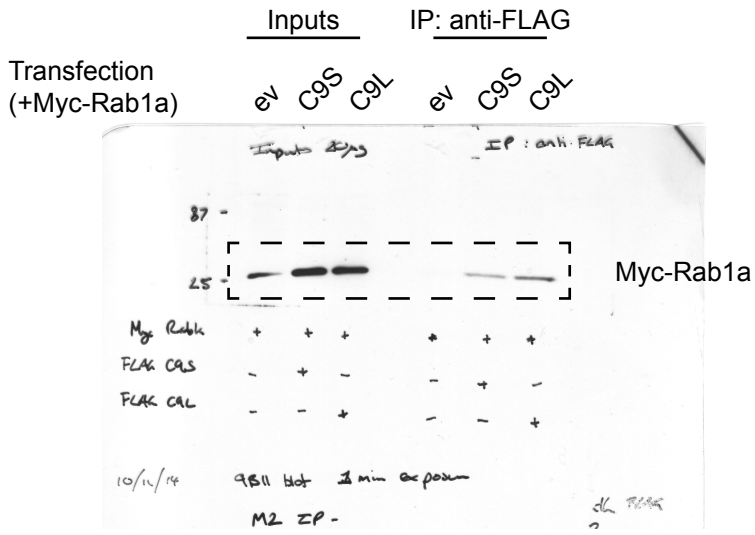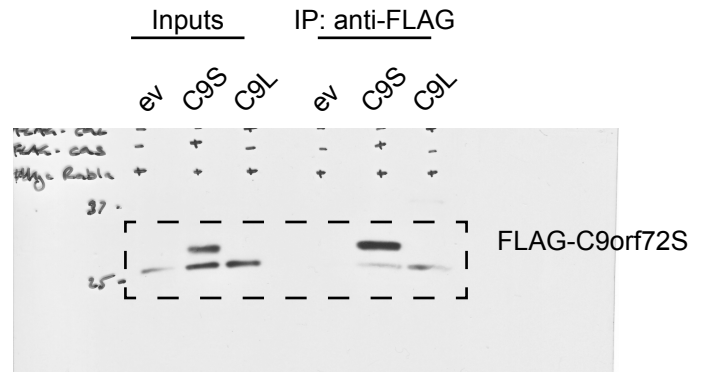

Syngene G-box marker overlay

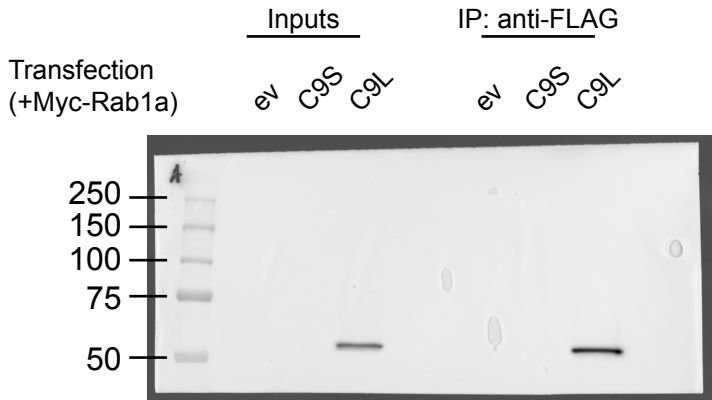

Raw data

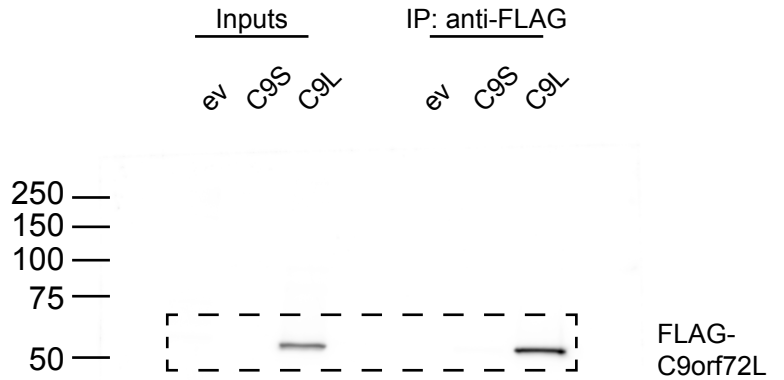

Supplement: EMBJ-35-1656-s007.pdf [file EMBJ-35-1656-s007.pdf]
